# Supplementary material for: Identification and characterisation of NANOG+/ OCT-4high/SOX2+ doxorubicin-resistant stem-like cells from transformed trophoblastic cell lines
Source: PubMed Central journal article supplement (PMC5805535; doi:10.18632/oncotarget.24151), 2018-01-11
Supplement: oncotarget-09-7054-s001.pdf [file oncotarget-09-7054-s001.pdf]

## **Identification and characterisation of NANOG<sup>+</sup>/ OCT-4<sup>high</sup>/ SOX2<sup>+</sup> doxorubicin-resistant stem-like cells from transformed trophoblastic cell lines**

### **SUPPLEMENTARY MATERIALS**

**Supplementary Table 1: HTR8/SVneo Spheres untreated vs treated up-regulated pathways.**

**See Supplementary File 1**

**Supplementary Table 2: HTR8/SVneo Spheres untreated vs treated down-regulated pathways.**

**See Supplementary File 2**

**Supplementary Table 3: TEV-1 Spheres untreated vs treated up-regulated pathways.**

**See Supplementary File 3**

**Supplementary Table 4: TEV-1 Spheres untreated vs treated down-regulated pathways.**

**See Supplementary File 4**

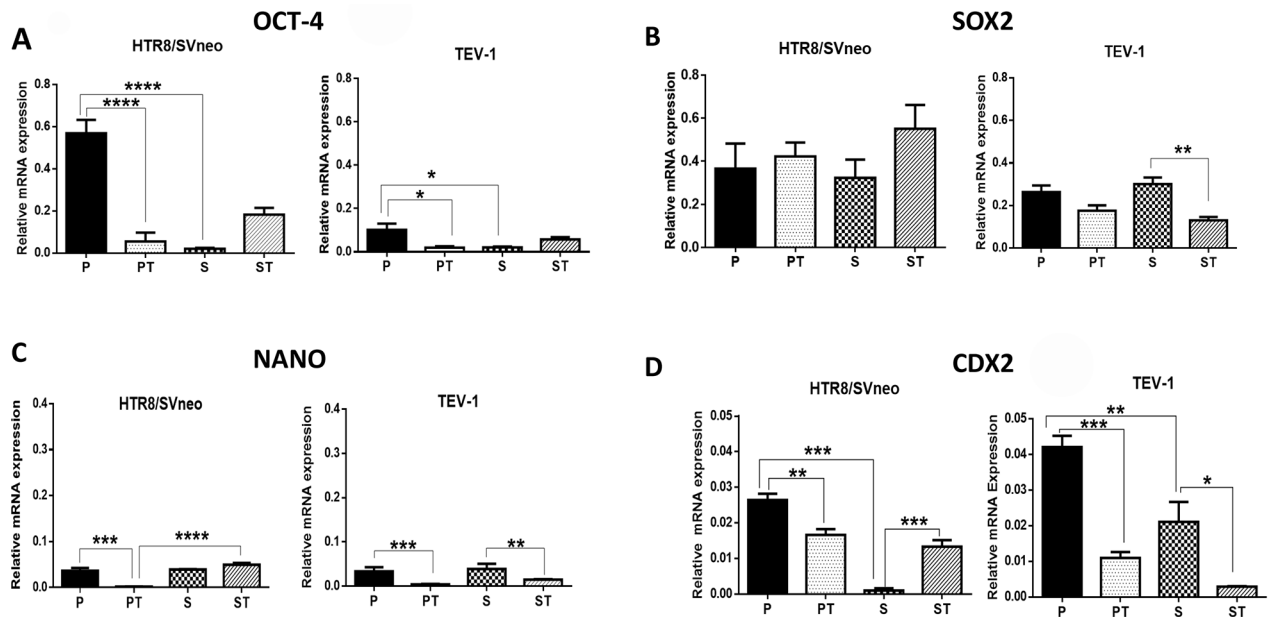

**Supplementary Figure 1:** Relative mRNA expression of OCT-4, SOX2, NANO and CDX2 in untreated and treated transformed parental trophoblast cells and spheroids are given in panels (A) (B) (C) and (D). Statistical significance was determined using a one-way ANOVA followed by Tukey’s test for multiple comparisons. Data represent the mean±SEM of three individual experiments, each performed in triplicate (\*\*\*\*p<0.0001; \*\*\*p<0.001; \*\*p<0.01; \*p<0.05).

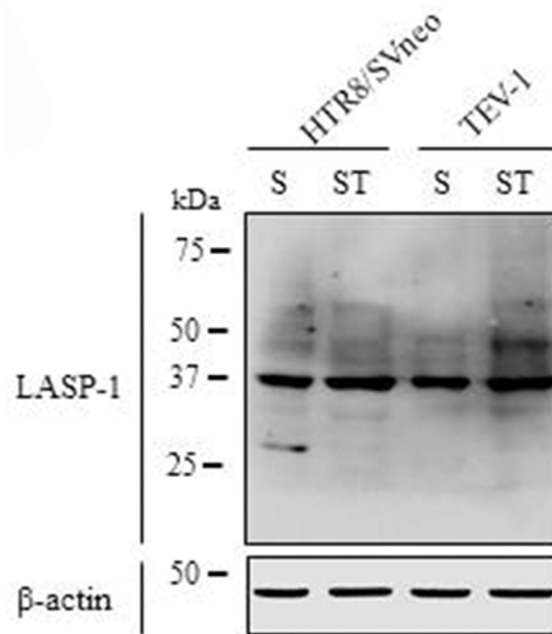

**Supplementary Figure 2:** LASP1 expression in untreated and treated transformed spheroids. Immunoblots showing the expression of LASP1 and corresponding β-actin loading controls in HTR8/SVneo and TEV-1 untreated and treated transformed spheroids. (confirmation of mass-spectrometry data).
