# Supplementary material for: Identification and characterisation of NANOG+/ OCT-4high/SOX2+ doxorubicin-resistant stem-like cells from transformed trophoblastic cell lines
Source: PubMed Central journal article supplement (PMC5805535; doi:10.18632/oncotarget.24151), 2018-01-11
Supplement: oncotarget-09-7054-s002.pdf [file oncotarget-09-7054-s002.pdf]

| Table 1: HTR8/SVneo Spheres untreated vs treated up-regulated pathways |                                                                                          |       |           |               |           |           |         |                                  |
|------------------------------------------------------------------------|------------------------------------------------------------------------------------------|-------|-----------|---------------|-----------|-----------|---------|----------------------------------|
| Enrichment by Pathway Maps                                             |                                                                                          |       |           | HTR8/SVneo UP |           |           |         |                                  |
| #                                                                      | Maps                                                                                     | Total | pValue    | Min FDR       | p-value   | FDR       | In Data | Network Objects from Active Data |
| 1                                                                      | <a href="#">Transport_ The role of AVP in regulation of Aquaporin 2 and renal water</a>  | 50    | 3.748E-04 | 6.372E-03     | 3.748E-04 | 6.372E-03 | 2       | MyHC, MYH9                       |
| 2                                                                      | <a href="#">Cytoskeleton remodeling_ Regulation of actin cytoskeleton by Rho GTPases</a> | 23    | 1.395E-02 | 4.918E-02     | 1.395E-02 | 4.918E-02 | 1       | MyHC                             |
| 3                                                                      | <a href="#">Cell cycle_ Initiation of mitosis</a>                                        | 26    | 1.576E-02 | 4.918E-02     | 1.576E-02 | 4.918E-02 | 1       | Lamin B                          |
| 4                                                                      | <a href="#">Cytoskeleton remodeling_ Thyroiberin in cytoskeleton remodeling</a>          | 33    | 1.996E-02 | 4.918E-02     | 1.996E-02 | 4.918E-02 | 1       | Keratin 8                        |
| 5                                                                      | <a href="#">Apoptosis and survival_ Caspase cascade</a>                                  | 34    | 2.056E-02 | 4.918E-02     | 2.056E-02 | 4.918E-02 | 1       | Lamin B                          |
| 6                                                                      | <a href="#">Cytoskeleton remodeling_ Keratin filaments</a>                               | 36    | 2.176E-02 | 4.918E-02     | 2.176E-02 | 4.918E-02 | 1       | Keratin 8                        |
| 7                                                                      | <a href="#">Development_ MAG-dependent inhibition of neurite outgrowth</a>               | 37    | 2.236E-02 | 4.918E-02     | 2.236E-02 | 4.918E-02 | 1       | MyHC                             |
| 8                                                                      | <a href="#">Apoptosis and survival_ FAS signaling cascades</a>                           | 44    | 2.654E-02 | 4.918E-02     | 2.654E-02 | 4.918E-02 | 1       | Lamin B                          |
| 9                                                                      | <a href="#">wtCFTR and deltaF508 traffic / Membrane expression (normal and CF)</a>       | 47    | 2.833E-02 | 4.918E-02     | 2.833E-02 | 4.918E-02 | 1       | Keratin 8                        |
| 10                                                                     | <a href="#">Cell adhesion_ Integrin-mediated cell adhesion and migration</a>             | 48    | 2.893E-02 | 4.918E-02     | 2.893E-02 | 4.918E-02 | 1       | MyHC                             |
| 11                                                                     | <a href="#">Airway smooth muscle contraction in asthma</a>                               | 56    | 3.368E-02 | 5.205E-02     | 3.368E-02 | 5.205E-02 | 1       | MyHC                             |
| 12                                                                     | <a href="#">N-Glycan biosynthesis p1</a>                                                 | 72    | 4.313E-02 | 5.593E-02     | 4.313E-02 | 5.593E-02 | 1       | RIB1                             |
| 13                                                                     | <a href="#">Blood coagulation_ Platelet microparticle generation</a>                     | 72    | 4.313E-02 | 5.593E-02     | 4.313E-02 | 5.593E-02 | 1       | MyHC                             |
| 14                                                                     | <a href="#">Immune response_ CCR3 signaling in eosinophils</a>                           | 77    | 4.606E-02 | 5.593E-02     | 4.606E-02 | 5.593E-02 | 1       | MyHC                             |
| 15                                                                     | <a href="#">Muscle contraction_ GPCRs in the regulation of smooth muscle tone</a>        | 83    | 4.958E-02 | 5.619E-02     | 4.958E-02 | 5.619E-02 | 1       | MyHC                             |
| 16                                                                     | <a href="#">Cytoskeleton remodeling_ Cytoskeleton remodeling</a>                         | 102   | 6.063E-02 | 6.121E-02     | 6.063E-02 | 6.121E-02 | 1       | MyHC                             |
| 17                                                                     | <a href="#">Oxidative phosphorylation</a>                                                | 103   | 6.121E-02 | 6.121E-02     | 6.121E-02 | 6.121E-02 | 1       | COX Va                           |
