# Supplementary material for: Identification and characterisation of NANOG+/ OCT-4high/SOX2+ doxorubicin-resistant stem-like cells from transformed trophoblastic cell lines
Source: PubMed Central journal article supplement (PMC5805535; doi:10.18632/oncotarget.24151), 2018-01-11
Supplement: oncotarget-09-7054-s003.pdf [file oncotarget-09-7054-s003.pdf]

**Table 2: HTR8/SVneo Spheres untreated vs treated down-regulated pathways**

| Enrichment by Pathway Maps |                                                                              |       |           |           | HTR8/SVneo DOWN |           |         |                                  |
|----------------------------|------------------------------------------------------------------------------|-------|-----------|-----------|-----------------|-----------|---------|----------------------------------|
| #                          | Maps                                                                         | Total | pValue    | Min FDP   | p-value         | FDR       | In Data | Network Objects from Active Data |
| 1                          | <a href="#">Transport_RAN regulation pathway</a>                             | 18    | 5.479E-03 | 1.494E-02 | 5.479E-03       | 1.494E-02 | 1       | Ran                              |
| 2                          | <a href="#">Cell cycle_Role of Nek in cell cycle regulation</a>              | 32    | 9.727E-03 | 1.494E-02 | 9.727E-03       | 1.494E-02 | 1       | Ran                              |
| 3                          | <a href="#">Cell cycle_Spindle assembly and chromosome separation</a>        | 33    | 1.003E-02 | 1.494E-02 | 1.003E-02       | 1.494E-02 | 1       | Ran                              |
| 4                          | <a href="#">Apoptosis and survival_APRIL and BAFF signaling</a>              | 39    | 1.185E-02 | 1.494E-02 | 1.185E-02       | 1.494E-02 | 1       | Cyclophilin B                    |
| 5                          | <a href="#">Transcription_Role of Akt in hypoxia induced HIF1 activation</a> | 41    | 1.245E-02 | 1.494E-02 | 1.245E-02       | 1.494E-02 | 1       | PGK1                             |
| 6                          | <a href="#">Glycolysis and gluconeogenesis</a>                               | 87    | 2.630E-02 | 2.630E-02 | 2.630E-02       | 2.630E-02 | 1       | PGK1                             |
