# Supplementary material for: Identification and characterisation of NANOG+/ OCT-4high/SOX2+ doxorubicin-resistant stem-like cells from transformed trophoblastic cell lines
Source: PubMed Central journal article supplement (PMC5805535; doi:10.18632/oncotarget.24151), 2018-01-11
Supplement: oncotarget-09-7054-s004.pdf [file oncotarget-09-7054-s004.pdf]

| Table 3: TEV-1 Spheres untreated vs treated up-regulated pathways |                                                                                    |       |           |           |           |           |         |                                  |
|-------------------------------------------------------------------|------------------------------------------------------------------------------------|-------|-----------|-----------|-----------|-----------|---------|----------------------------------|
| Enrichment by Pathway Maps                                        |                                                                                    |       |           |           | TEV-1 UP  |           |         |                                  |
| #                                                                 | Maps                                                                               | Total | pValue    | Min FDP   | p-value   | FDR       | In Data | Network Objects from Active Data |
| 1                                                                 | <a href="#">Cytoskeleton remodeling Role of PKA in cytoskeleton reorganisation</a> | 40    | 4.066E-03 | 4.066E-03 | 4.066E-03 | 4.066E-03 | 1       | LASP1                            |
