# Supplementary material for: Identification and characterisation of NANOG+/ OCT-4high/SOX2+ doxorubicin-resistant stem-like cells from transformed trophoblastic cell lines
Source: PubMed Central journal article supplement (PMC5805535; doi:10.18632/oncotarget.24151), 2018-01-11
Supplement: oncotarget-09-7054-s005.pdf [file oncotarget-09-7054-s005.pdf]

**Table 4: TEV-1 Spheres untreated vs treated down-regulated pathways**

| Enrichment by Pathway Maps |                                                                                                  |       |           |           | TEV-1 DOWN |           |         |                                  |
|----------------------------|--------------------------------------------------------------------------------------------------|-------|-----------|-----------|------------|-----------|---------|----------------------------------|
| #                          | Maps                                                                                             | Total | pValue    | Min FDR   | p-value    | FDR       | In Data | Network Objects from Active Data |
| 1                          | <a href="#">Immune response_Antigen presentation by MHC class I_classical pathway</a>            | 54    | 1.551E-06 | 3.723E-05 | 1.551E-06  | 3.723E-05 | 3       | Calreticulin, PDIA3,             |
| 2                          | <a href="#">Immune response_Antigen presentation by MHC class I_cross-presentation</a>           | 99    | 9.829E-04 | 1.179E-02 | 9.829E-04  | 1.179E-02 | 2       | Calreticulin, HSP70              |
| 3                          | <a href="#">Proteolysis_Putative ubiquitin pathway</a>                                           | 23    | 1.164E-02 | 3.896E-02 | 1.164E-02  | 3.896E-02 | 1       | HSP70                            |
| 4                          | <a href="#">CFTR folding and maturation (normal and CF)</a>                                      | 24    | 1.214E-02 | 3.896E-02 | 1.214E-02  | 3.896E-02 | 1       | HSP70                            |
| 5                          | <a href="#">Proteolysis_Role of Parkin in the Ubiquitin-Proteasomal Pathway</a>                  | 24    | 1.214E-02 | 3.896E-02 | 1.214E-02  | 3.896E-02 | 1       | HSP70                            |
| 6                          | <a href="#">Development_Glucocorticoid receptor signaling</a>                                    | 25    | 1.264E-02 | 3.896E-02 | 1.264E-02  | 3.896E-02 | 1       | HSP70                            |
| 7                          | <a href="#">Apoptosis and survival_Role of IAP-proteins in apoptosis</a>                         | 31    | 1.566E-02 | 3.896E-02 | 1.566E-02  | 3.896E-02 | 1       | HSP70                            |
| 8                          | <a href="#">Oxidative stress_Role of ASK1 under oxidative stress</a>                             | 34    | 1.716E-02 | 3.896E-02 | 1.716E-02  | 3.896E-02 | 1       | HSP70                            |
| 9                          | <a href="#">Immune response_TLR ligands</a>                                                      | 34    | 1.716E-02 | 3.896E-02 | 1.716E-02  | 3.896E-02 | 1       | HSP70                            |
| 10                         | <a href="#">Role of Endothelin-1 in inflammation and vasoconstriction in Sickle cell disease</a> | 38    | 1.917E-02 | 3.896E-02 | 1.917E-02  | 3.896E-02 | 1       | P4HB                             |
| 11                         | <a href="#">Regulation of degradation of deltaF508-CFTR in CF</a>                                | 39    | 1.967E-02 | 3.896E-02 | 1.967E-02  | 3.896E-02 | 1       | HSP70                            |
| 12                         | <a href="#">Mechanisms of deltaF508 CFTR activation by S-nitroso glutathione</a>                 | 47    | 2.366E-02 | 3.896E-02 | 2.366E-02  | 3.896E-02 | 1       | HSP70                            |
| 13                         | <a href="#">w/CFTR and deltaF508 traffic / Membrane expression (normal and CF)</a>               | 47    | 2.366E-02 | 3.896E-02 | 2.366E-02  | 3.896E-02 | 1       | Calreticulin                     |
| 14                         | <a href="#">Proline metabolism</a>                                                               | 51    | 2.566E-02 | 3.896E-02 | 2.566E-02  | 3.896E-02 | 1       | P4HB                             |
| 15                         | <a href="#">Immune response_HSP60 and HSP70/ TLR signaling pathway</a>                           | 54    | 2.715E-02 | 3.896E-02 | 2.715E-02  | 3.896E-02 | 1       | HSP70                            |
| 16                         | <a href="#">Apoptosis and survival_Endoplasmic reticulum stress response pathway</a>             | 56    | 2.814E-02 | 3.896E-02 | 2.814E-02  | 3.896E-02 | 1       | GRP78                            |
| 17                         | <a href="#">Transcription_Role of VDR in regulation of genes involved in osteoporosis</a>        | 61    | 3.063E-02 | 3.896E-02 | 3.063E-02  | 3.896E-02 | 1       | Calreticulin                     |
| 18                         | <a href="#">Neuroprotective action of lithium</a>                                                | 63    | 3.162E-02 | 3.896E-02 | 3.162E-02  | 3.896E-02 | 1       | HSP70                            |
| 19                         | <a href="#">Signal transduction_mTORC2 upstream signaling</a>                                    | 65    | 3.261E-02 | 3.896E-02 | 3.261E-02  | 3.896E-02 | 1       | HSP70                            |
| 20                         | <a href="#">Transcription_Negative regulation of HIF1A function</a>                              | 66    | 3.310E-02 | 3.896E-02 | 3.310E-02  | 3.896E-02 | 1       | HSP70                            |
| 21                         | <a href="#">Immune response_Sublytic effects of membrane attack complex</a>                      | 68    | 3.409E-02 | 3.896E-02 | 3.409E-02  | 3.896E-02 | 1       | GRP78                            |
| 22                         | <a href="#">Signal transduction_mTORC1 upstream signaling</a>                                    | 74    | 3.706E-02 | 4.042E-02 | 3.706E-02  | 4.042E-02 | 1       | PDIA3                            |
| 23                         | <a href="#">SLE genetic marker-specific pathways in antigen-presenting cells (APC)</a>           | 84    | 4.198E-02 | 4.380E-02 | 4.198E-02  | 4.380E-02 | 1       | GRP78                            |
| 24                         | <a href="#">SLE genetic marker-specific pathways in B cells</a>                                  | 100   | 4.981E-02 | 4.981E-02 | 4.981E-02  | 4.981E-02 | 1       | GRP78                            |
